# Supplementary figures and images for: Aberrant Notch Signaling in the Bone Marrow Microenvironment of Acute Lymphoid Leukemia Suppresses Osteoblast-Mediated Support of Hematopoietic Niche Function
Source: Oxford University Press journal article supplement (doi:10.1158/0008-5472.can-15-2092), 2016-01-22

**Supplemental Figures**

**Fig S1**

**
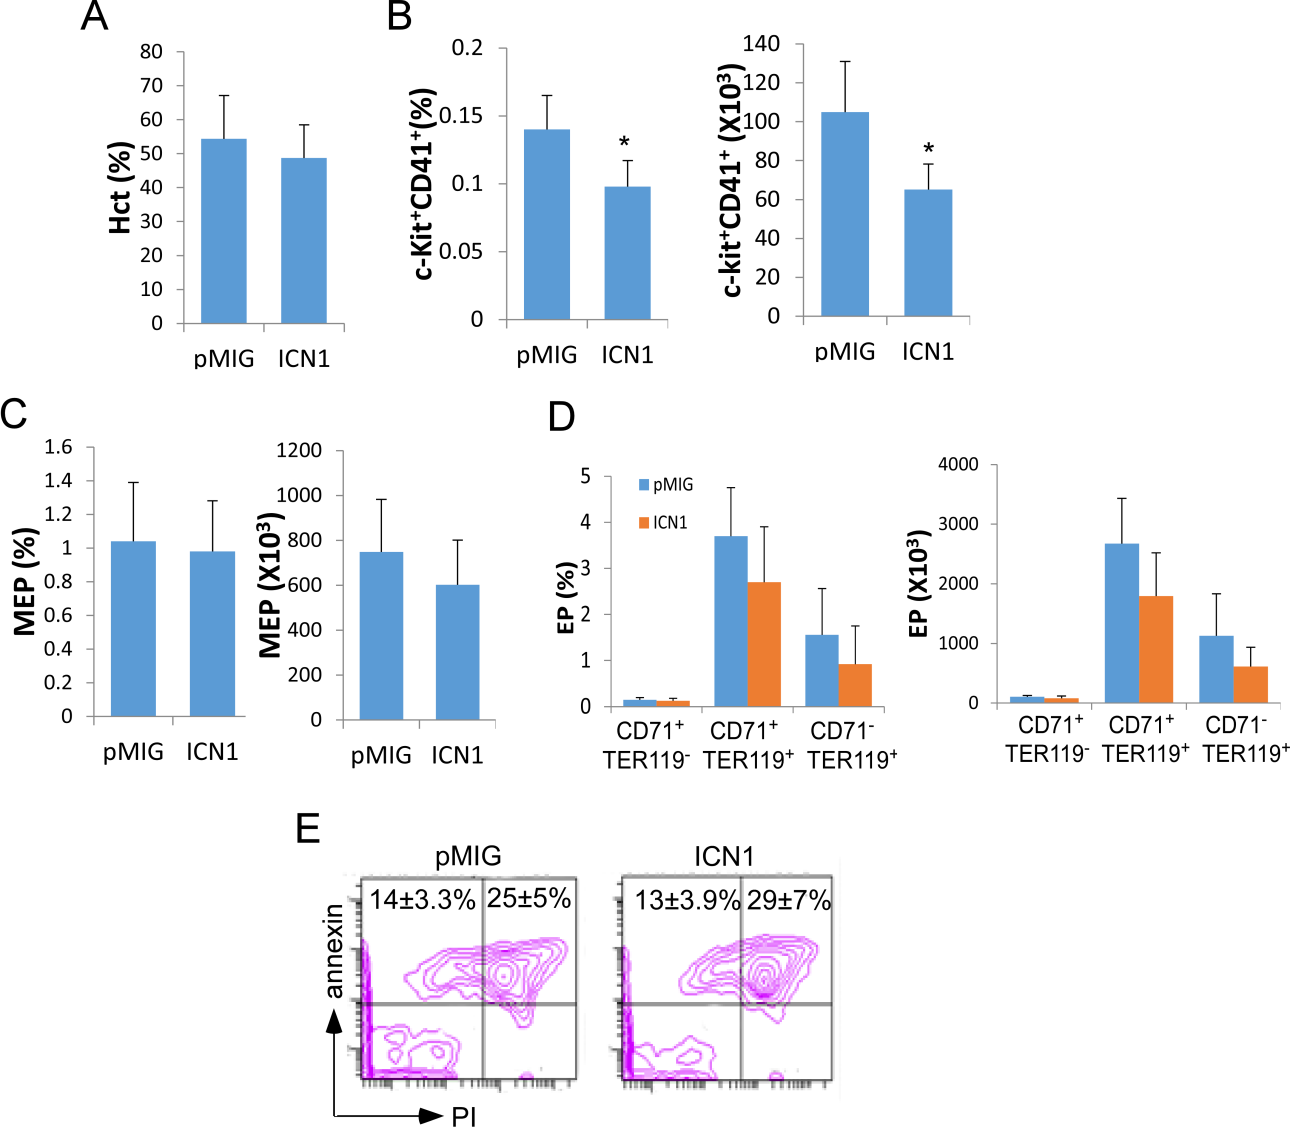
**

**Fig S2**

**
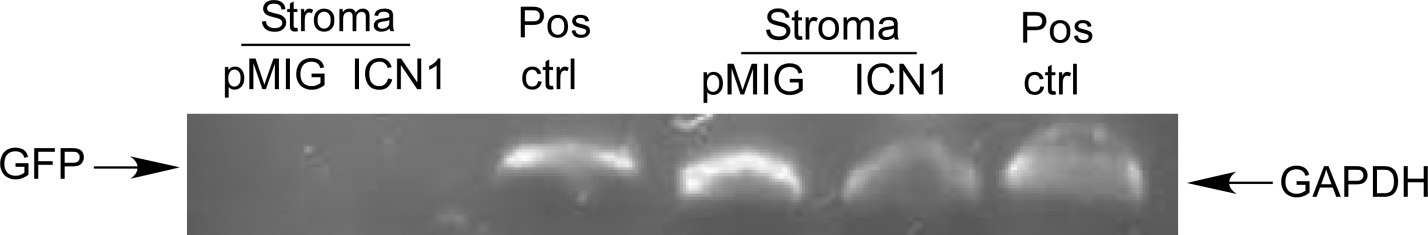
**

**Fig S3**

**
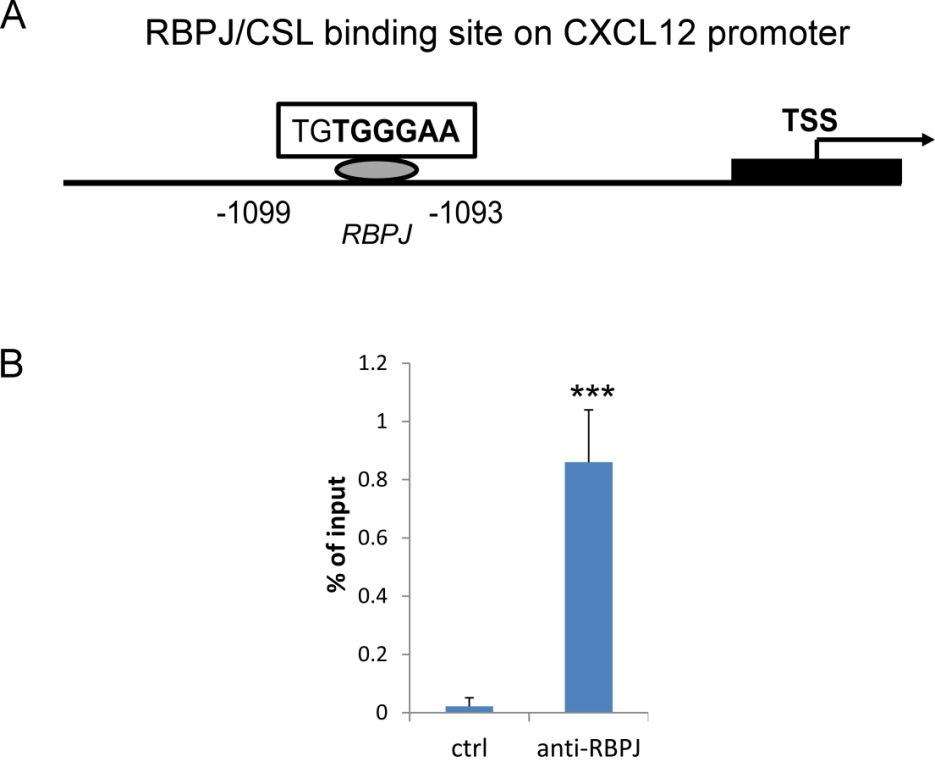
**

**Fig S4**

**
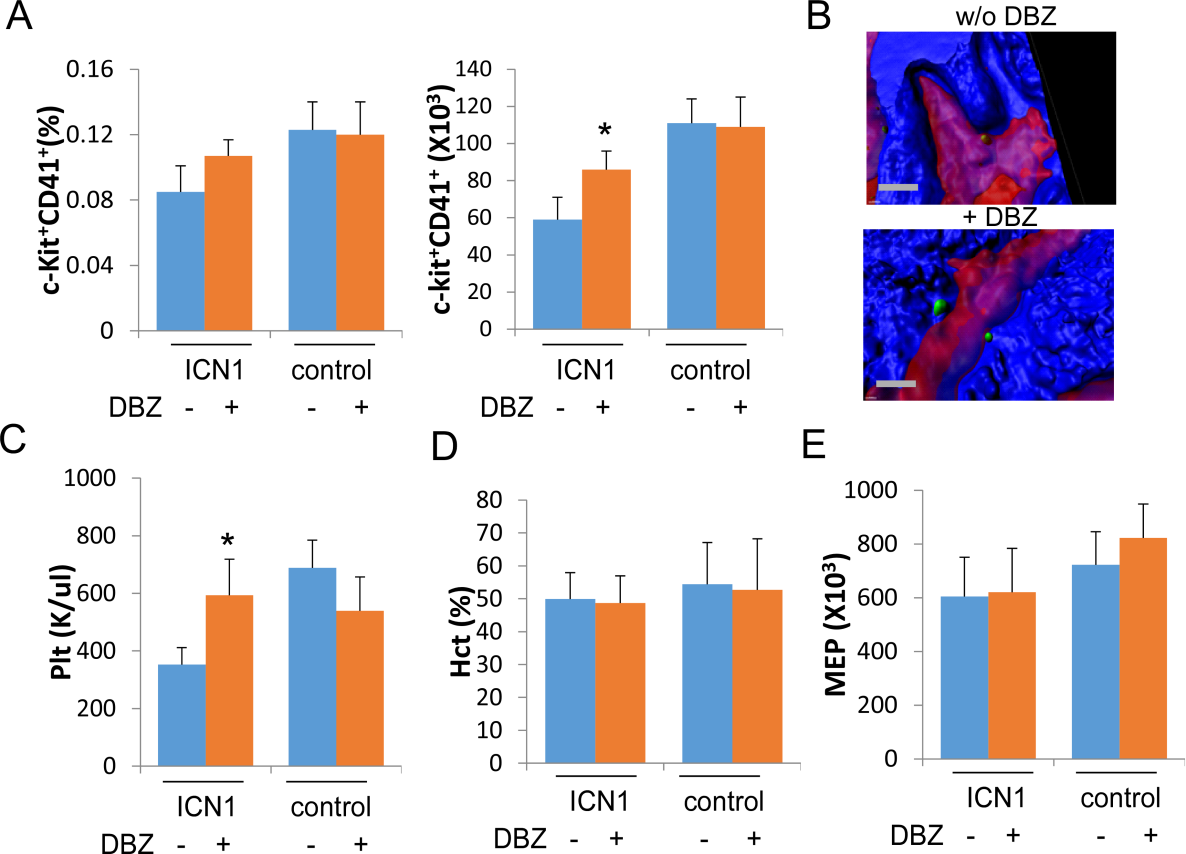
**

Supplement: 00085472can152092-sup-153435_1_supp_data_3264213_nz60lj.docx [file 00085472can152092-sup-153435_1_supp_data_3264213_nz60lj.docx]
